# Supplementary material
Source: HighWire-hosted journal article supplement (https://cmaj.ca/highwire/filestream/78598/field_highwire_adjunct_files/0/202604-res-1-at.pdf)
Supplement: 202604-res-1-at.pdf [file 202604-res-1-at.pdf]

## Appendix 1. Search strategy

### PubMed

- 1 (severe acute respiratory syndrome coronavirus 2 [Text Word] OR SARS-CoV-2 [Text Word] OR coronavirus [Text Word] OR novel-corona\* OR new-corona\*)
- 2 (coronavirus disease-2019 [Text Word] OR COVID-19 [Text Word] OR 2019-nCoV [Text Word] OR 2019nCoV [Text Word] OR 2019-novel-corona [Text Word] OR 2019-new-corona [Text Word])
- 3 or/1-2
- 4 (pregnancy [Mesh] OR pregnant [Text Word] OR pregnan [Text Word] OR antepartum [Text Word] OR prenatal [Text Word] OR "ante-partum" [Text Word] OR "pre-natal" [Text Word] OR "obstetric" [Text Word] OR "antenatal" [Text Word] OR)
- 5 (maternal [Text Word] OR mother [Text Word] OR antepartum [Text Word] OR prenatal [Text Word] OR ante-partum [Text Word] OR pre-natal [Text Word] OR obstetric [Text Word] OR antenatal [Text Word] OR maternal [Text Word])
- 6 (Infancy [Mesh] OR Infant [Text Word] OR newborn [Text Word] OR fetal [Text Word] OR postnatal [Text Word])
- 7 or/4-6
- 8 3 and 7

### Embase

- 1 (SARS-CoV-2 or SARS-CoV2 or severe acute respiratory syndrome coronavirus 2 or 2019-nCoV or 2019nCoV or coronavirus or covid-19 or COVID19 or COVID-19 or).tw

- 2 2 exp coronavirus infections/
- 3 exp coronavirinae/
- 4 or/1-3
- 5 exp pregnancy/
- 6 exp birth/
- 7 fetus/
- 8 exp infant/
- 9 (maternal\* or pregnan\* or prenatal or antenatal or perinatal or postpartum or postnatal or fetus\* or fetal or neonate\* or neonatal or newborn\* or baby or babies or infant\*).tw, kw.
- 10 or/5-9
- 11 4 and 10
